# Supplementary material for: Genetic autophagy enhancement improves neuroinflammation and recovery after spinal cord injury via transcriptomic modulation
Source: Research Square preprint supplement (doi:10.21203/rs.3.rs-7236997/v1), 2025-07-30
Supplement: Supplementary file 1 [file 4c727cd0452ec541fbbf270a.pdf]

# **Genetic autophagy enhancement improves neuroinflammation and recovery after spinal cord injury via transcriptomic modulation**

Zhuofan Lei, Yun Li, Hui Li, Junfang Wu\*

Department of Anesthesiology and Center for Shock, Trauma and Anesthesiology Research (STAR), University of Maryland School of Medicine, Baltimore, MD 21201, USA.

\*Corresponding authors

Junfang Wu, email: [Junfang.Wu@som.umaryland.edu](mailto:Junfang.Wu@som.umaryland.edu), phone: 410-706-5189

## **Supplementary Information**

Supplemental Information comprises nine supplemental figures with corresponding legends and two supplemental tables.

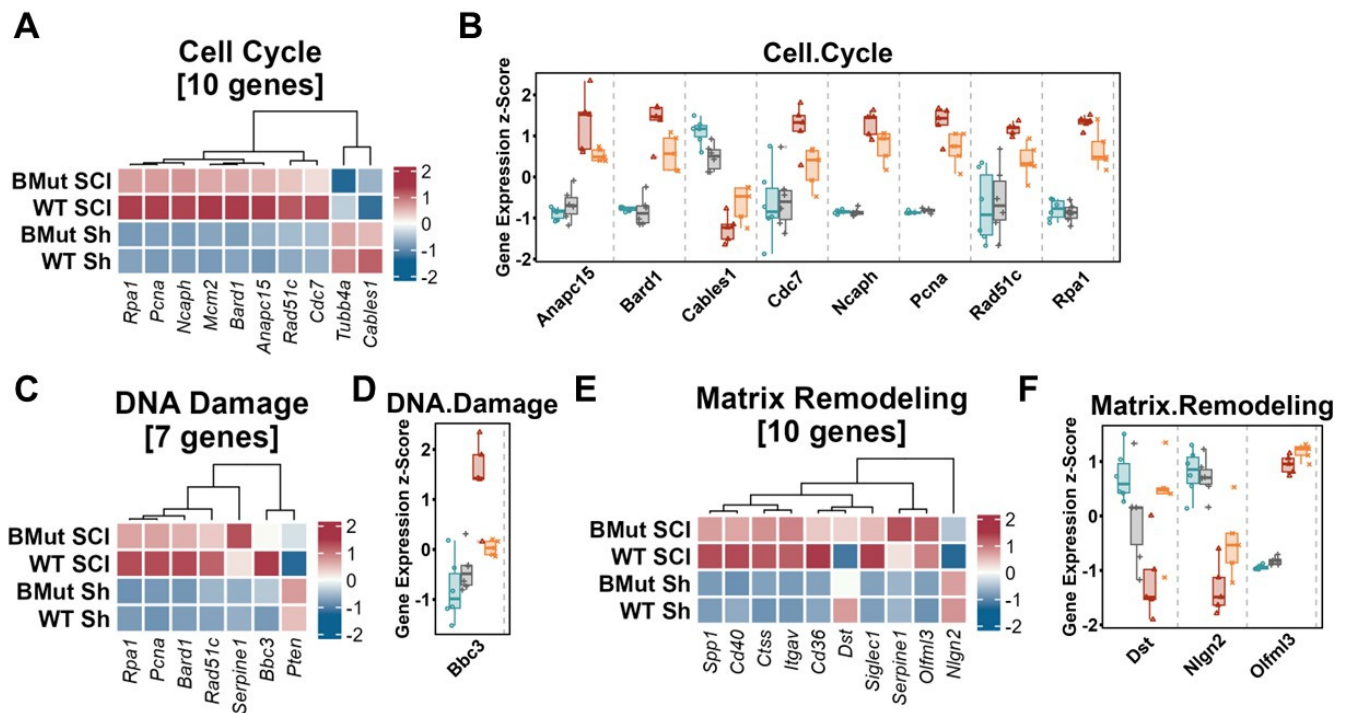

**Supplementary Figure 1. Genetic enhancement of autophagy in *Becn1*<sup>F121A/F121A</sup> mice (BMut) shows different gene responses in pathways of Cell Cycle, DNA damage, and Matrix Remodeling in injured spinal cord tissues (SPC) at 3 days post-injury. (A)** A heatmap of gene z-scores involved in Cell Cycle pathway based on the differential expressed genes (DEGs) from Fig.1C. **(B)** Box plots of the representative genes among the four groups included in (A). **(C-F)** Heatmaps and box plots were displayed for pathways of DNA damage (C-D) and Matrix Remodeling (E-F). n=6 mice (Sham) and 5 mice (SCI) each group.

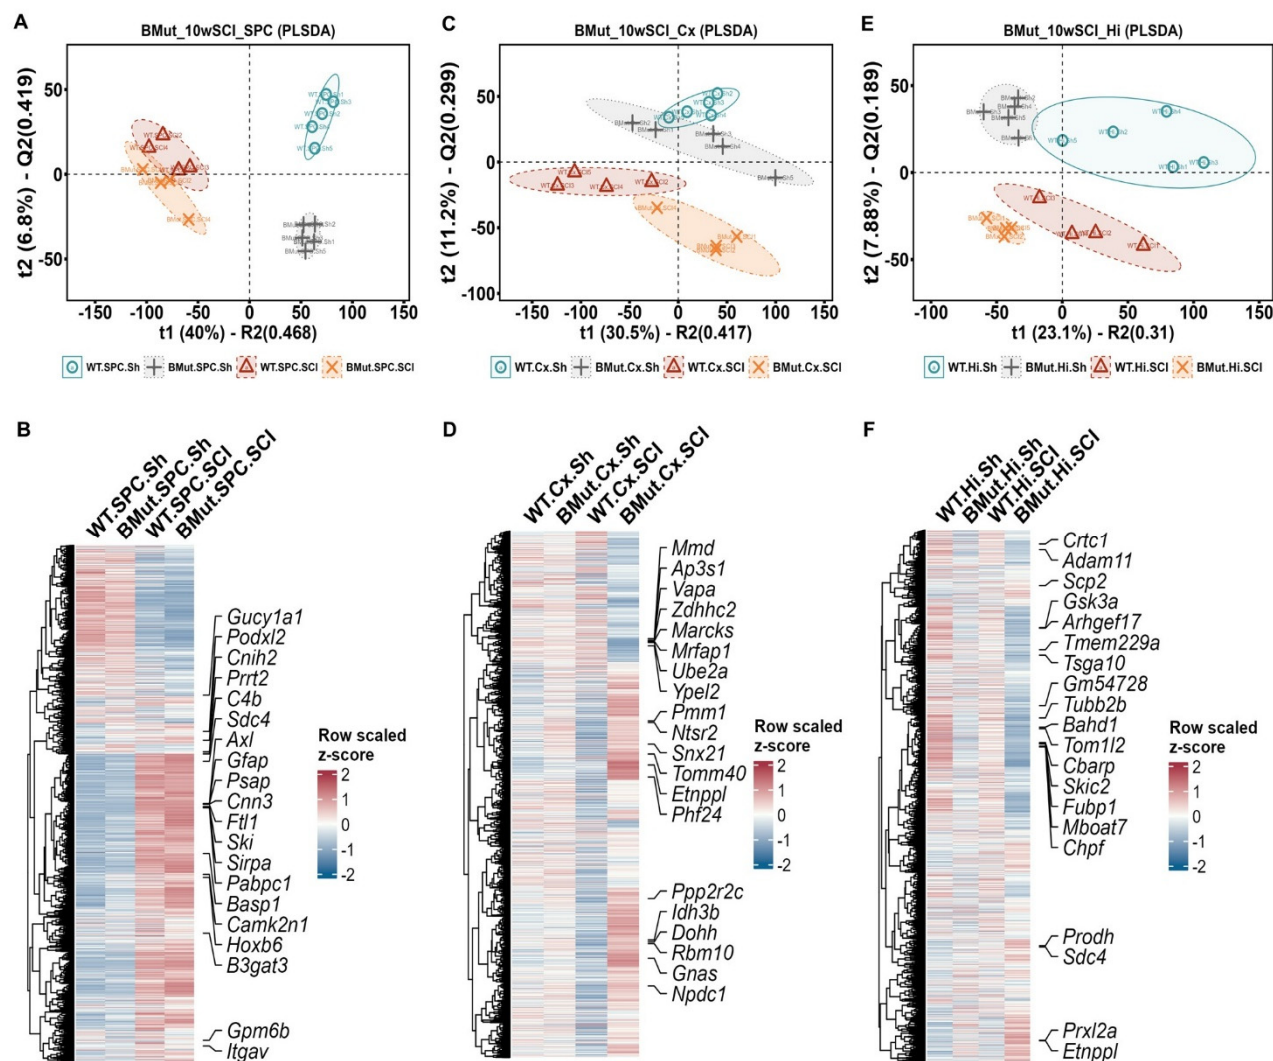

**Supplementary Figure 2. Comparative transcriptomic profiling of spinal cord tissues (SPC), somatosensory cortex (Cx), and hippocampus (Hi) between *Becn1*<sup>F121A/F121A</sup> (BMut) and WT mice at 10 weeks after SCI.** (A) Partial Least Squares Discriminant Analysis (PLS-DA) plot of the raw RNA-seq data from SPC indicated that the two main principal components of variation were captured on the x- and y-axis, respectively, showing a clear separation of clusters between the Sham (Sh) and SCI groups. (B) Gene expression profiles from SPC RNA-seq were visualized as z-score heatmaps, with top 20 genes marked based on PLS-DA. (C-F) The PLS-DA plots and heatmaps of the RNAseq data were shown for Cx (C-D) and Hi (E-F). n=5 mice (Sham) and 4 mice (SCI) each group.

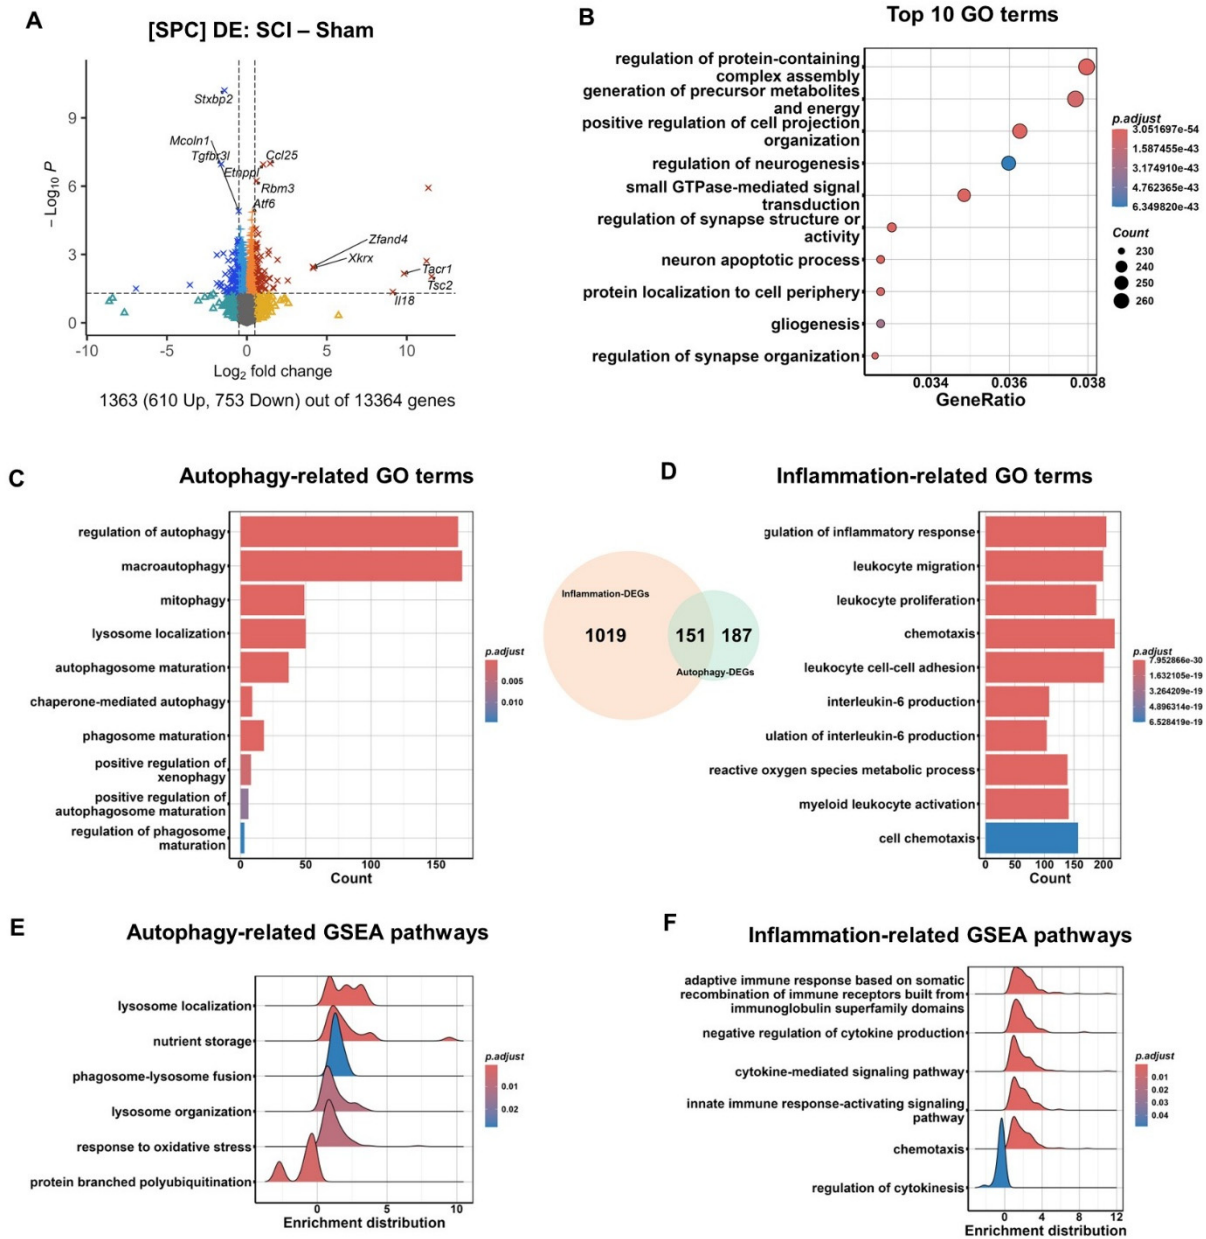

**Supplementary Figure 3. Chronic SCI potentiates the immune response and activated autophagy-lysosome pathways in spinal cord tissue (SPC) of both *Becn1*<sup>F121A/F121A</sup> and WT mice.** (A) The volcano plot displayed the significance and fold changes of all genes from the differential expression analysis comparing the injury effect in SPC of SCI versus Sham. (B) Top 10 enriched GO terms derived from DEGs showing a significant injury effect in (A). (C) Top 10 GO terms related to Autophagy process. (D) Top 10 GO terms related to inflammation and immune responses. (E) GSEA terms indicating dysregulation of autophagy-related signaling pathways. (F) Neuroinflammation-related functional pathways that were upregulated or downregulated according to GSEA.

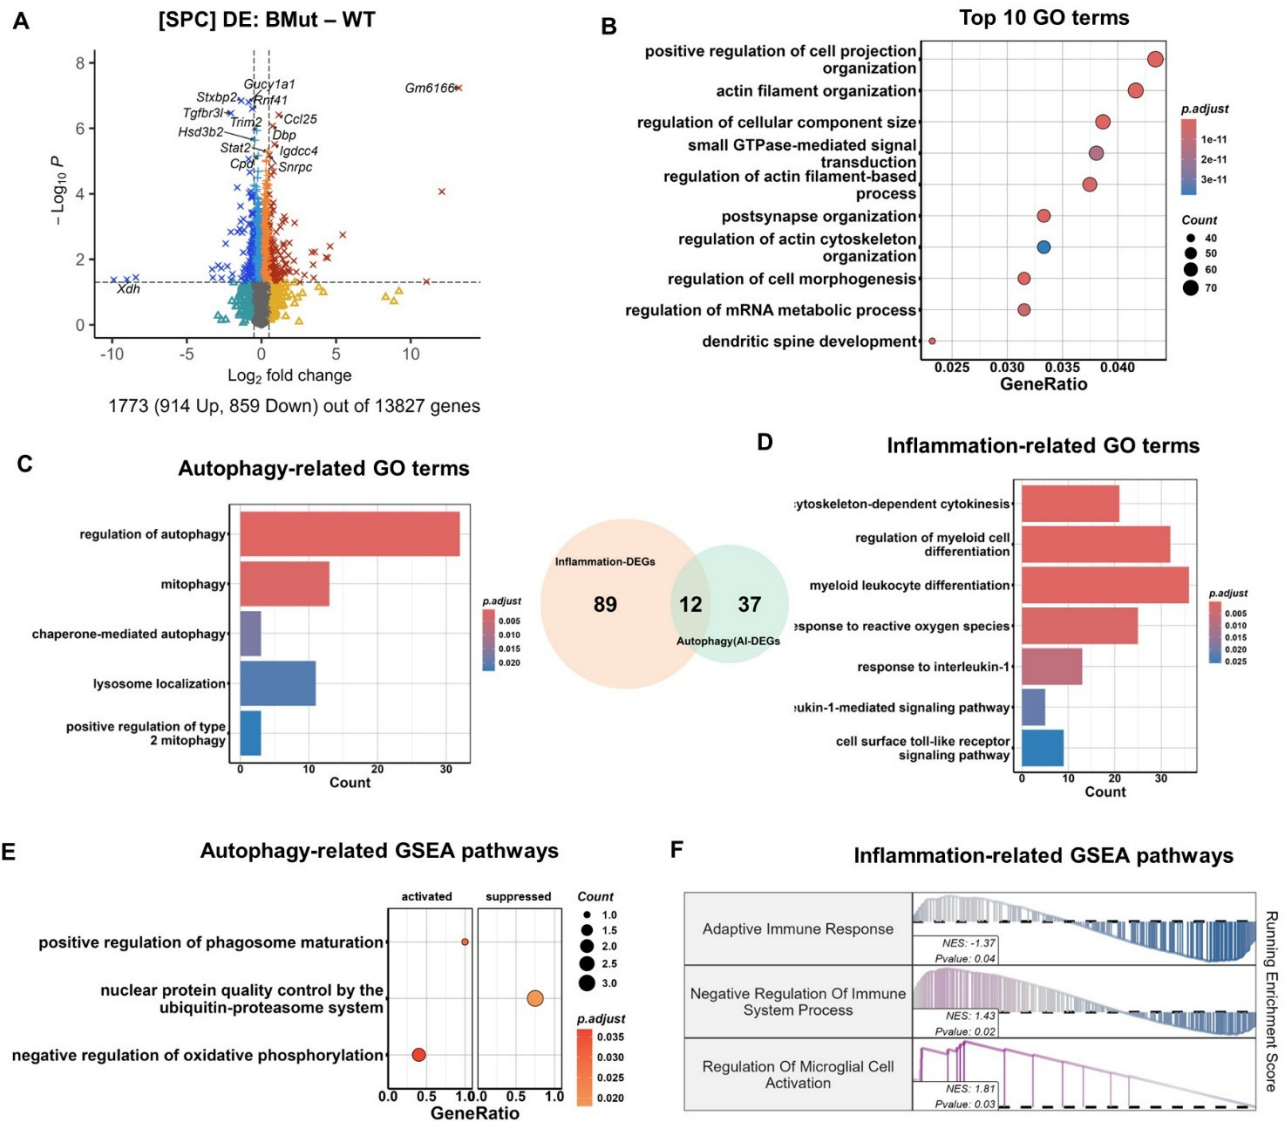

**Supplementary Figure 4. *Becn1*<sup>F121A/F121A</sup> mutation (BMut) alters the expression of genes involved in autophagy- and inflammation-related pathways in spinal cord tissue (SPC) 10 weeks after SCI. (A)** The volcano plot displays the significance and fold changes of all genes from the differential expression analysis of the genotype effect in SPC, comparing BMut to WT. **(B)** Top 10 enriched GO terms derived from DEGs with significant genotype effect in (A). **(C)** Top GO terms related to Autophagy process. **(D)** Top GO terms related to inflammation and immune responses. **(E)** GSEA terms indicating the activation or suppression of Autophagy related signaling pathways. **(F)** Functionally activated or suppressed neuroinflammatory pathways identified by GSEA.

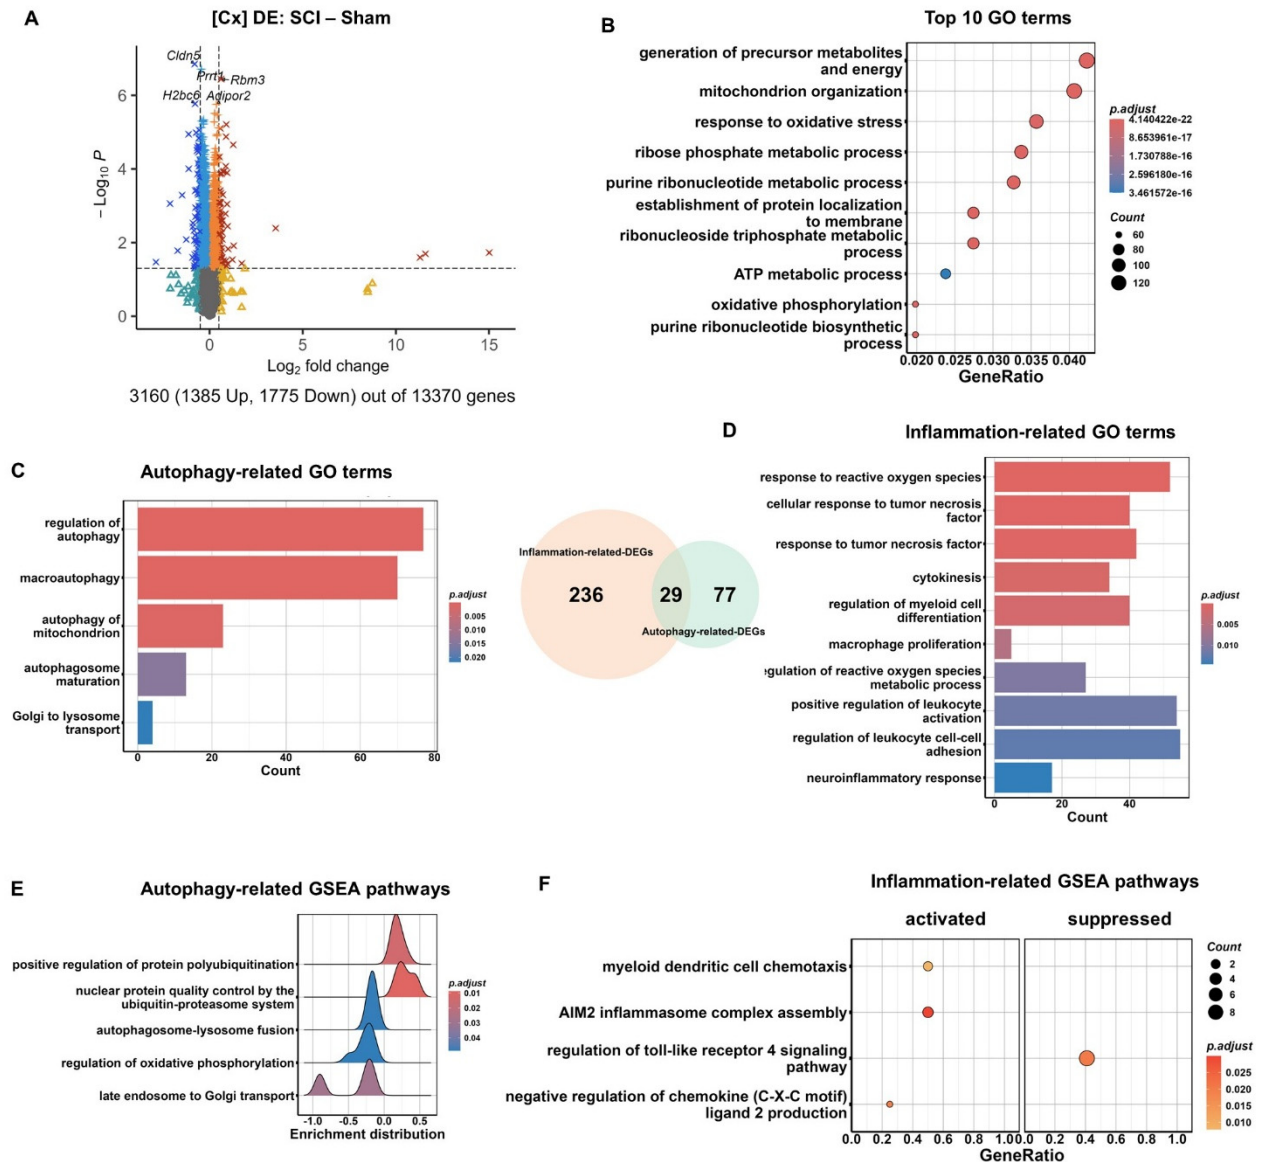

**Supplementary Figure 5. SCI impairs autophagy-lysosome pathways with inflammatory homeostasis perturbed in somatosensory cortex (Cx) 10 weeks after SCI. (A)** The volcano plot displayed the significance and fold changes of all genes from the differential expression genes (DEGs) analysis of injury effects in the Cx (SCI vs. Sham). **(B)** Top 10 enriched GO terms derived from DEGs with significant injury effect in (A). **(C)** Top 10 GO terms related to Autophagy process. **(D)** Top 10 GO terms related to inflammation and immune responses. **(E)** Gene Set Enrichment Analysis (GSEA) terms indicating the dysregulation of Autophagy related signaling pathways. **(F)** Neuroinflammation-related pathways found to be up- or down-regulated based on GSEA.

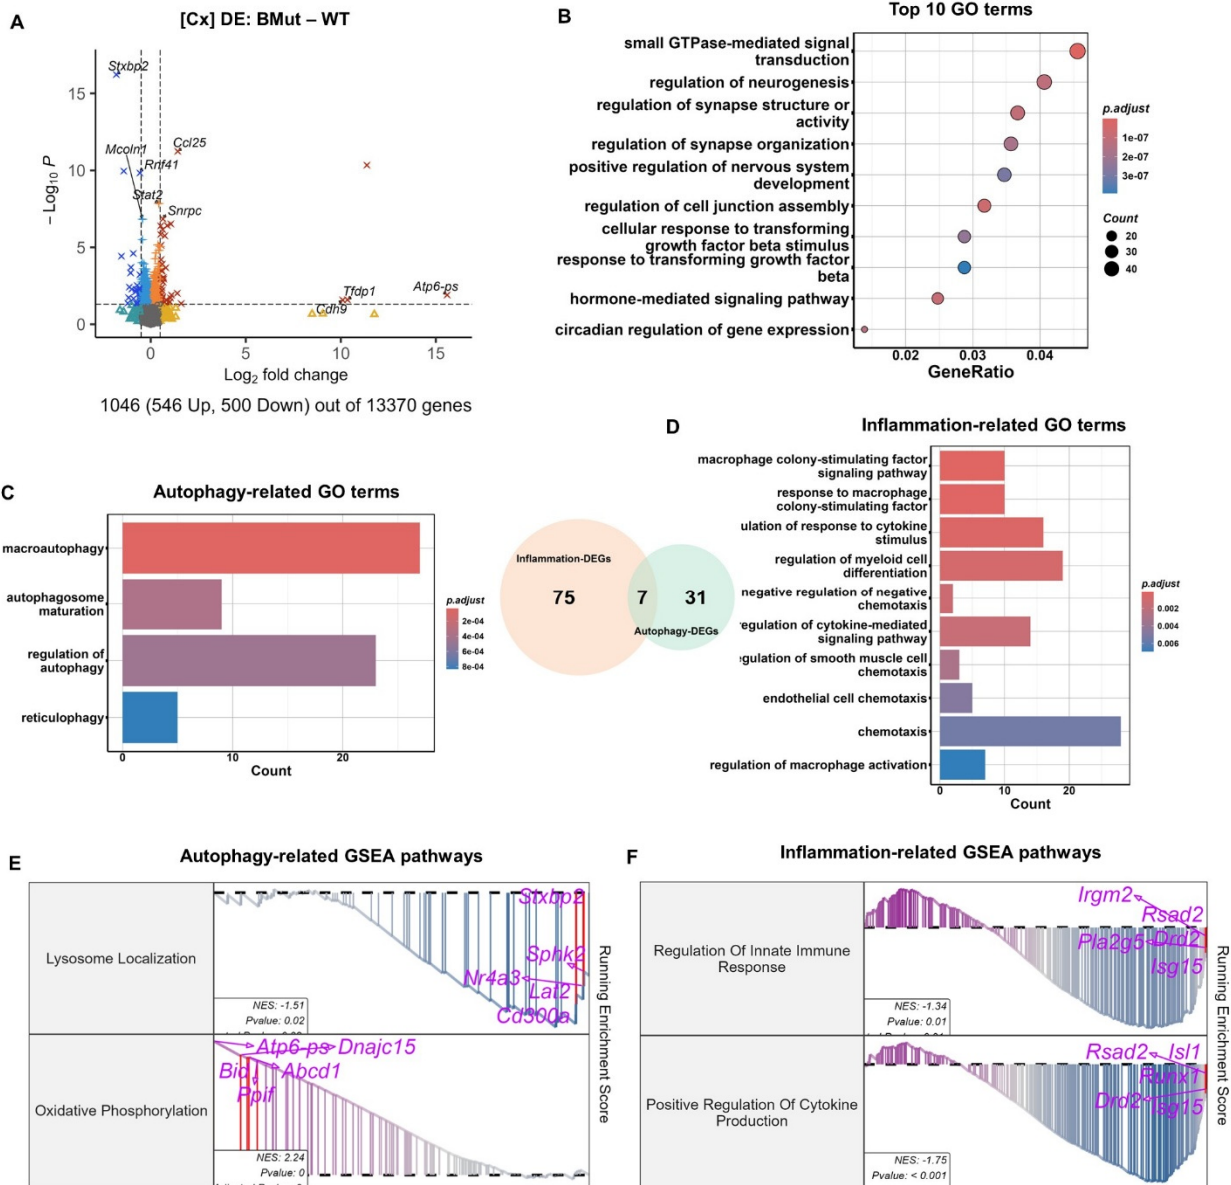

**Supplementary Figure 6. *Becn1*<sup>F121A/F121A</sup> mutation mitigates immune responses by regulating autophagy-lysosome pathways in somatosensory cortex (Cx).** (A) The volcano plot displays the significance and fold changes of all genes from the differential expression genes (DEGs) analysis of genotype effects in the Cx (BMut vs. WT). (B) Top 10 enriched GO terms derived from DEGs with significant injury effect in (A). (C) Top GO terms related to Autophagy process. (D) Top GO terms related to inflammation and immune responses. (E) Gene Set Enrichment Analysis (GSEA) revealed suppression of the 'Lysosome Localization' pathway and activation of the 'Oxidative Phosphorylation' pathway, both related to autophagy. (F) GSEA identified terms associated with the suppression of neuroinflammation-related signaling pathways.

**A** [Hi] DE: SCI – Sham

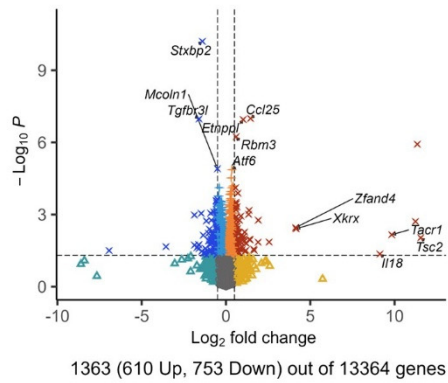

**B** Top 10 GO terms

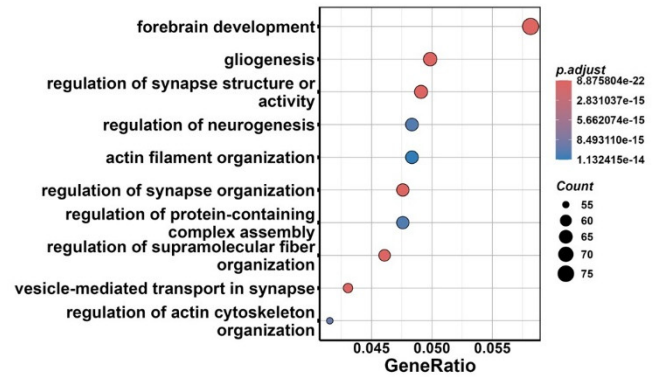

**C** Autophagy-related GO terms

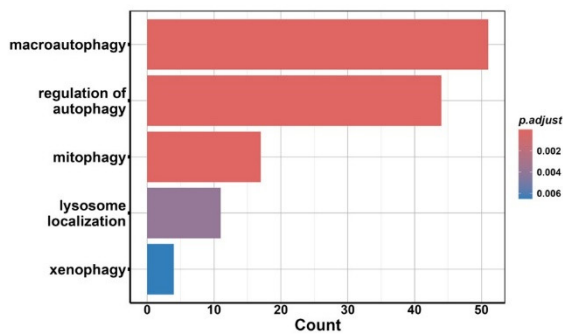

**D** Inflammation-related GO terms

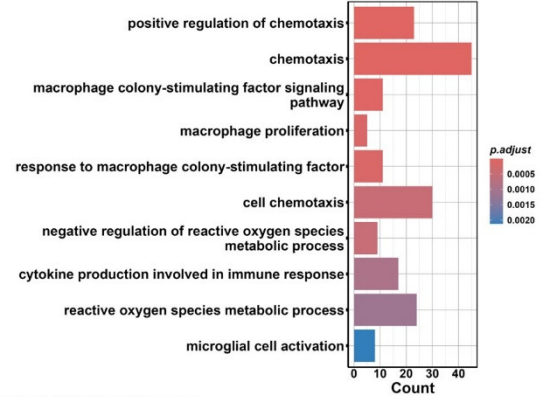

**E**

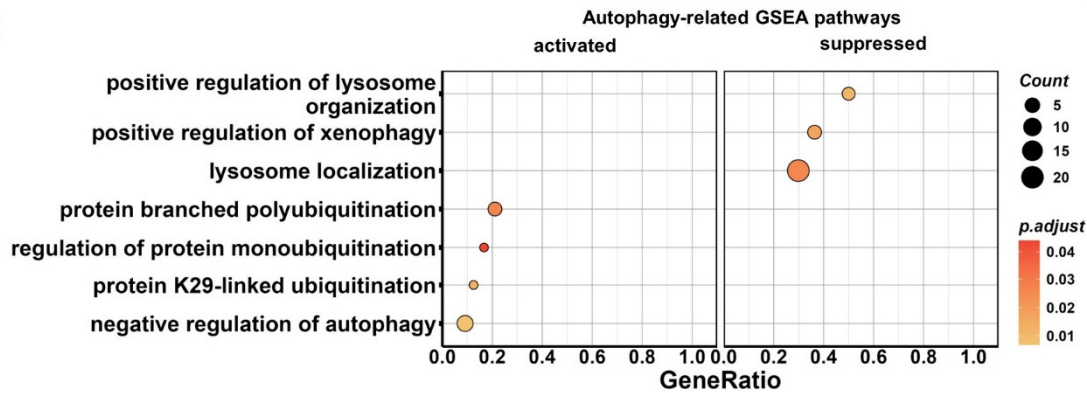

**F**

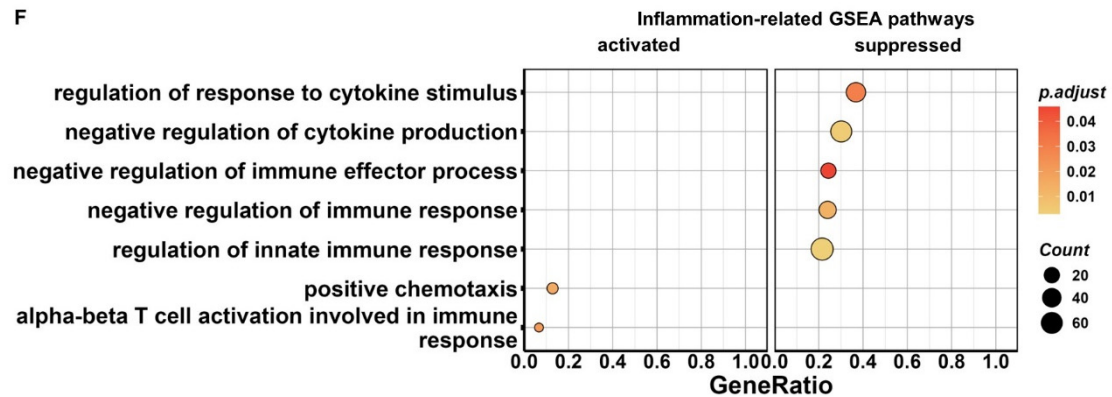

**Supplementary Figure 7. SCI dysregulates Autophagy-lysosome signaling and immune responses in mouse hippocampus 10 weeks post-injury. (A)** The volcano plot displays the significance and fold changes of all genes from the differential expression genes (DEGs) analysis of injury effects in the hippocampus (SCI vs. Sham). **(B)** Top 10 enriched GO terms derived from DEGs with significant injury effect in (A). **(C)** Top GO terms related to Autophagy process. **(D)** Top 10 GO terms related to inflammation and immune responses. **(E-F)** GSEA terms showing activation or suppression of autophagy-related signaling pathways (E) and neuroinflammation-related functional pathways (F).

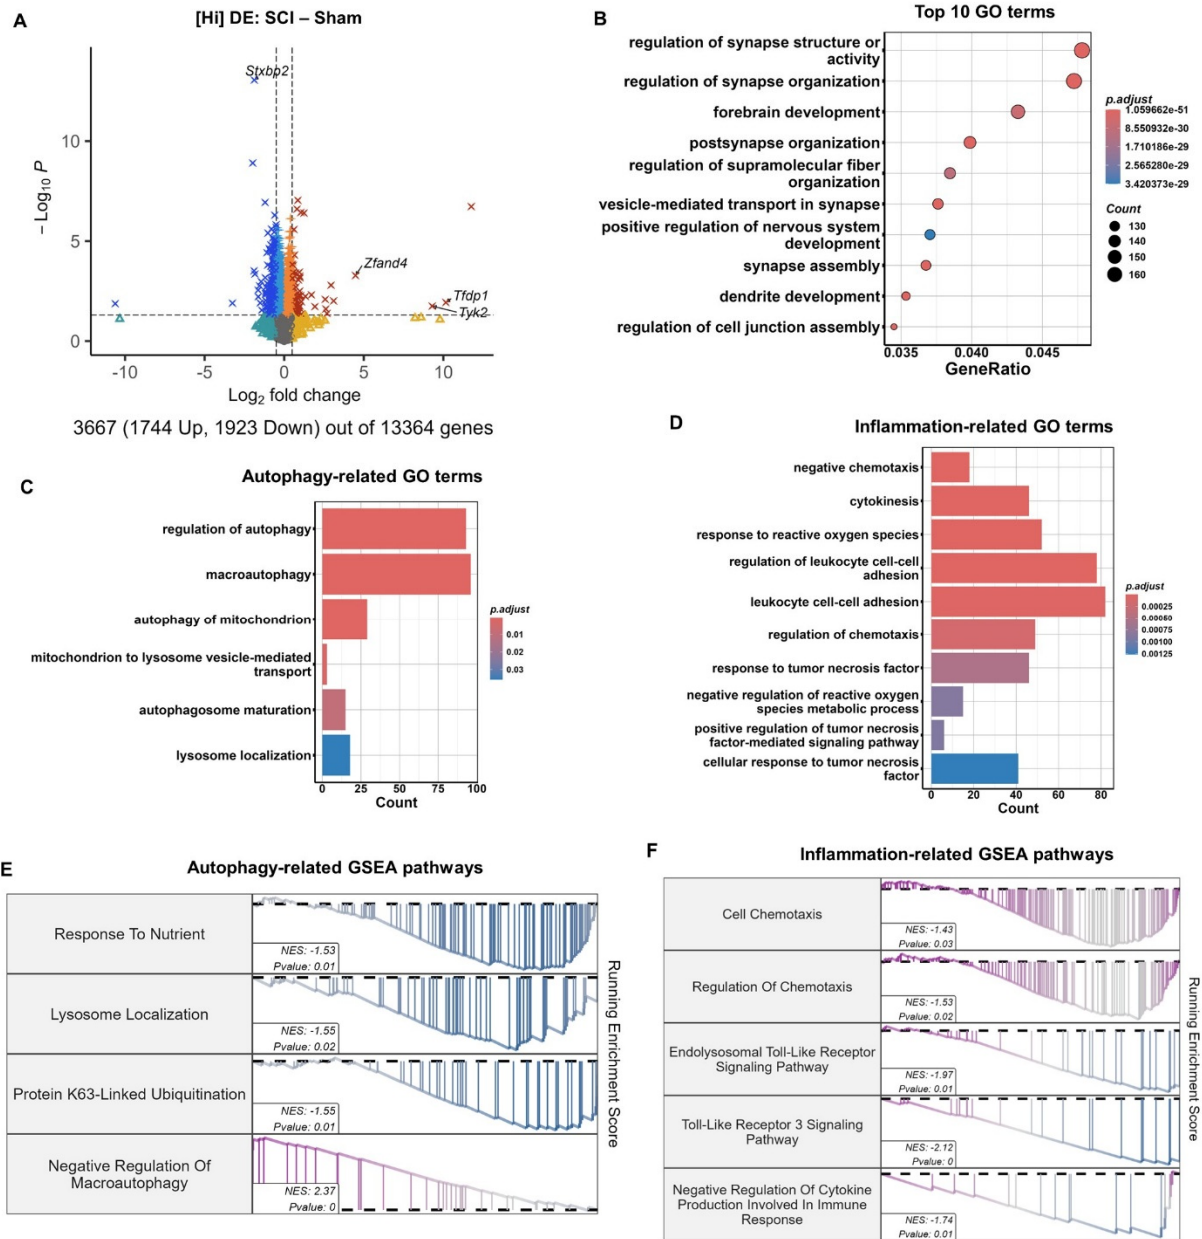

**Supplementary Figure 8. *Becn1*<sup>F121A/F121A</sup> mutation (BMut) regulates autophagy-lysosome pathways accompanied by alleviated proinflammatory responses in the hippocampus (Hi).** (A) The volcano plot shows the significance and fold changes of all genes from the differential expression genes (DEGs) analysis of genotype effects in the hippocampus (BMut vs. WT). (B) Top 10 enriched GO terms derived from DEGs with significant injury effect in (A). (C) Top GO terms related to Autophagy process. (D) Top GO terms related to inflammation and immune responses. (E-F) GSEA terms showing conversely regulation of multiple Autophagy-related signaling pathways (E) and suppressed functional pathway of “Cell Chemotaxis” and “Regulation of Chemotaxis” (F).

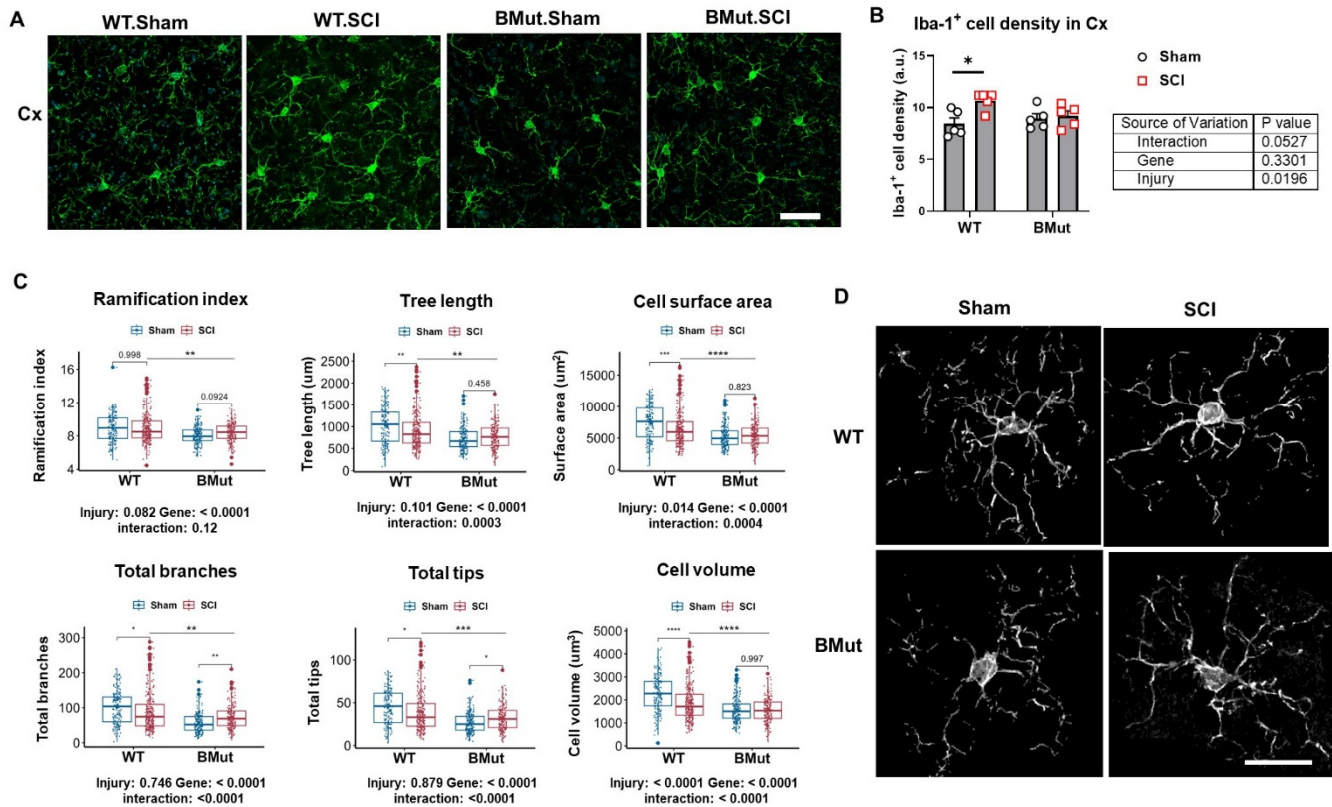

**Supplementary Figure 9. *Becl1*<sup>F121A/F121A</sup> mutation (BMut) alters microglial responses to SCI in somatosensory cortex (Cx).** (A) Representative confocal images showed microglia stained by Iba-1 with DAPI in mice Cx. (B) Microglial cell numbers were quantified per field of view under 100x magnification. n=5 mice/group. (C) Typical morphological characteristics revealed the different response to SCI in microglia cells in Cx of BMut mice compared to WT. N=170 cells from 5 WT.Sham mice; N=196 cells from 5 BMut.Sham mice; N=262 cells from 5 WT.SCI mice; N=178 cells from 5 BMut.SCI mice. (D) Representative images of Cx microglia cells after MotiQ processing. Scale bars=20 μm (A) and 50 μm (D). \*p<0.05; \*\*p<0.01; \*\*\*p<0.001; \*\*\*\*p<0.0001; Two-way ANOVA with Turkey's test for (B-C).

**Supplemental Table 1. *Becn1*<sup>F121A/F121A</sup> mutation (BMut) modulates pathway enrichment scores of the NanoString Neuroinflammation Panel in acutely injured spinal cord tissue (SPC).**

| <b>Pathway (SPC, p value)</b> | <b>Gene</b> | <b>Injury</b> | <b>Gene x Injury</b> |
|-------------------------------|-------------|---------------|----------------------|
| Cell.Cycle                    | 0.880004191 | 5.48374E-15   | 0.011661032*         |
| Adaptive.Immune.Response      | 0.209333014 | 9.55018E-16   | 0.016899954*         |
| Innate.Immune.Response        | 0.189547326 | 4.60228E-16   | 0.030399703*         |
| DNA.Damage                    | 0.688336109 | 1.52455E-14   | 0.030489457*         |
| Autophagy                     | 0.127561025 | 1.1266E-15    | 0.035878854*         |
| Autophagy                     | 0.127561025 | 1.1266E-15    | 0.035878854*         |
| Microglia.Function            | 0.226611855 | 1.16272E-16   | 0.047390995*         |
| Matrix.Remodeling             | 0.178848871 | 5.07868E-16   | 0.049660073*         |
| Angiogenesis                  | 0.202743547 | 2.39883E-15   | 0.05420309           |
| Wnt                           | 0.456381959 | 1.64381E-12   | 0.067343918          |
| Cytokine.Signaling            | 0.386077695 | 1.99036E-16   | 0.067977313          |
| Insulin.Signaling             | 0.604700203 | 5.10048E-15   | 0.07877218           |
| Apoptosis                     | 0.592549694 | 2.89248E-15   | 0.094746236          |
| Oligodendrocyte.Function      | 0.959428442 | 2.21045E-10   | 0.101744634          |
| Growth.Factor.Signaling       | 0.280267492 | 1.05474E-15   | 0.111724708          |
| NF.kB                         | 0.290623352 | 6.10046E-16   | 0.128434119          |
| Notch                         | 0.569321685 | 9.08782E-14   | 0.156596165          |
| Neurons.and.Neurotransmission | 0.486298327 | 9.50496E-16   | 0.164599579          |
| Astrocyte.Function            | 0.165735232 | 9.35095E-17   | 0.184024401          |
| Lipid.Metabolism              | 0.061204948 | 7.73194E-14   | 0.195831785          |
| Cellular.Stress               | 0.356324076 | 5.61433E-15   | 0.207677506          |
| Epigenetic.Regulation         | 0.120649426 | 3.02596E-13   | 0.253526063          |
| Carbohydrate.Metabolism       | 0.247720465 | 2.40276E-11   | 0.443137277          |

P values corresponding to genotype, injury, and their interaction were determined for each pathway using two-way ANOVA. n=6 mice (Sham) and 5 mice (SCI) each group.

**Supplemental Table 2. *Becn1*<sup>F121A/F121A</sup> mutation (BMut) alters the gene enrichment scores in the pathways of "Autophagy", "Inflammatory Signaling", "Microglia Function", "Adaptive Immune Response", "Innate Immune Response", "Cell Cycle", "DNA Damage", and "Matrix Remodeling".** Spinal cord tissues were harvested at 3 days after SCI and analyzed by the Nanostring Neuroinflammation panel.

| GeneID   | Gene       | Injury     | Gene.x.Injury |          |            |             |              |
|----------|------------|------------|---------------|----------|------------|-------------|--------------|
| Lamp1    | 0.1078805  | 1.64E-09   | 2.02E-05*     | Pcna     | 0.03283863 | 5.16E-12    | 0.00884707*  |
| Irf8     | 0.00775827 | 1.46E-15   | 0.000123019*  | Anapc15  | 0.16603479 | 1.11E-08    | 0.009205643* |
| Lfng     | 0.01083864 | 5.01E-07   | 0.000263228*  | Trem2    | 0.10407465 | 4.53E-15    | 0.009743725* |
| Fabp5    | 0.00192545 | 6.62E-16   | 0.000307202*  | Mpeg1    | 0.03597419 | 8.00E-14    | 0.010609086* |
| Cd74     | 0.00195364 | 2.15E-10   | 0.000343345*  | Fscn1    | 0.14627904 | 6.28E-10    | 0.012309888* |
| Rapgef3  | 0.9937324  | 4.39E-08   | 0.000347049*  | Blnk     | 0.02375149 | 7.63E-14    | 0.017181538* |
| Atg7     | 0.7900934  | 3.51E-10   | 0.000351185*  | Ncapb    | 0.02381991 | 4.95E-13    | 0.01726268*  |
| Cables1  | 0.69640067 | 9.71E-10   | 0.000627098*  | Msr1     | 0.04066679 | 3.63E-12    | 0.020276168* |
| Hmgb1    | 0.0192628  | 0.5462854  | 0.000818662*  | C3ar1    | 0.05792032 | 1.59E-13    | 0.023307656* |
| Bcl2l1   | 0.4524523  | 1.64E-06   | 0.000821985*  | Il15ra   | 0.23744979 | 0.585194849 | 0.02898828*  |
| Ly9      | 0.00098085 | 9.45E-14   | 0.000918886*  | Nlgn2    | 0.12213152 | 2.19E-07    | 0.034255356* |
| Npl      | 0.00635783 | 2.55E-14   | 0.001170606*  | Rpa1     | 0.01483834 | 2.66E-11    | 0.03571988*  |
| Bbc3     | 0.08658874 | 2.14E-05   | 0.00132165*   | Bard1    | 0.02528881 | 1.21E-09    | 0.03586115*  |
| Siglec1  | 0.0066499  | 4.87E-11   | 0.001703533*  | Hcar2    | 0.04107248 | 1.08E-08    | 0.051362068  |
| Cln3     | 0.1770597  | 7.58E-14   | 0.001812727*  | Vegfa    | 0.2893385  | 0.00386076  | 0.052350678  |
| Stx18    | 0.0003424  | 0.0001809  | 0.001927818*  | Tmem206  | 0.01389938 | 2.41E-11    | 0.054100478  |
| Bad      | 0.3108369  | 1.24E-10   | 0.002365029*  | Serpine1 | 0.09177816 | 9.89E-05    | 0.06544678   |
| Dst      | 0.40918654 | 0.02603568 | 0.0026337*    | Cd40     | 0.00170818 | 9.85E-12    | 0.073431394  |
| Slc44a1  | 0.02818356 | 6.36E-11   | 0.002729349*  | Braf     | 0.01845125 | 4.32E-09    | 0.088786977  |
| F3       | 0.46120239 | 1.07E-10   | 0.003239302*  | Cdc7     | 0.22679248 | 0.00038315  | 0.092039212  |
| Vps4b    | 0.6486491  | 7.26E-07   | 0.003564961*  | Ets2     | 0.00792817 | 6.96E-05    | 0.107005919  |
| Cd36     | 0.0043792  | 1.71E-09   | 0.003764413*  | Tubb4a   | 0.02647205 | 1.11E-06    | 0.122713913  |
| Ppfia4   | 0.24644267 | 7.55E-10   | 0.003911705*  | Rad51c   | 0.36684382 | 0.0001043   | 0.127772155  |
| Pla2g5   | 0.0217196  | 0.0022845  | 0.004216925*  | Nlrp3    | 0.06473549 | 4.98E-09    | 0.142370232  |
| Ctse     | 0.11416658 | 0.29962148 | 0.004444991*  | Ptms     | 4.68E-06   | 2.20E-08    | 0.145941563  |
| Itgav    | 0.0536947  | 1.42E-18   | 0.004744994*  | Tmem119  | 0.00023961 | 1.40E-15    | 0.180166241  |
| Rab7     | 0.0404094  | 8.25E-05   | 0.005080793*  | Spint1   | 0.02735508 | 6.18E-12    | 0.184530903  |
| Vav1     | 0.26143    | 4.75E-14   | 0.005683154*  | Flt1     | 0.00486563 | 9.76E-06    | 0.210599194  |
| Ccr2     | 0.06016618 | 6.99E-10   | 0.005722084*  | Pten     | 0.0569349  | 0.0002715   | 0.228302736  |
| Ctss     | 0.18763315 | 3.57E-14   | 0.005744229*  | Olfml3   | 0.00256723 | 6.35E-19    | 0.268531092  |
| Cd68     | 0.014192   | 2.07E-13   | 0.005745681*  | Becn1    | 0.0011427  | 0.0355985   | 0.298679252  |
| Mcm2     | 0.04551015 | 1.13E-10   | 0.005788023*  | Lrrc3    | 0.00240177 | 9.37E-11    | 0.389065053  |
| Spp1     | 0.01302041 | 4.08E-13   | 0.007933586*  | Gpr84    | 0.03248659 | 5.69E-11    | 0.414658182  |
| Igsf6    | 0.86525744 | 1.96E-09   | 0.008115462*  | Slc2a5   | 0.00182871 | 0.32317209  | 0.418335689  |
| Tnfrsf1b | 0.0243471  | 9.37E-12   | 0.008126273*  | Hps4     | 0.01449391 | 4.15E-06    | 0.418956446  |
| Slc2a1   | 0.00398762 | 9.40E-13   | 0.008541972*  | Gbp2     | 0.02157703 | 9.91E-10    | 0.604504954  |
| Zfp367   | 0.00740865 | 6.95E-10   | 0.008601037*  |          |            |             |              |

P values corresponding to genotype, injury, and their interaction were determined for each pathway using two-way ANOVA. n=6 mice (Sham) and 5 mice (SCI) each group.
